# Supplementary material for: Evaluation of the effect of site substitution of Pr doping in the lithium garnet system Li5La3Nb2O12
Source: Royal Society of Chemistry journal article supplement (doi:10.1039/d0dt01497d), 2020-01-01
Supplement: d0dt01497d1.pdf [file d0dt01497d1.pdf]

Supplementary Information - Evaluation of the effect of site substitution of Pr doping in the Lithium  
garnet system  $\text{Li}_5\text{La}_3\text{Nb}_2\text{O}_{12}$

M. P. Stockham<sup>1\*</sup>, B. Dong<sup>1</sup>, Y. Ding<sup>2</sup>, Y. Li<sup>2</sup>, P.R. Slater<sup>1\*</sup>

<sup>1</sup>School of Chemistry, University of Birmingham, Birmingham B15 2TT. UK

<sup>2</sup>School of Chemical Engineering, University of Birmingham, Birmingham B15 2TT. UK

Correspondence to

M. P. Stockham/P. R. Slater

School of Chemistry, University of Birmingham, Birmingham B15 2TT. UK

Comparative XRD patterns before and after densification via high temperature  $N_2$  heat treatments, showing increased phase degradation as Pr content increased. Additionally, in figure S1a an XRD pattern is shown after storage in an Ar glove box for 1 week.

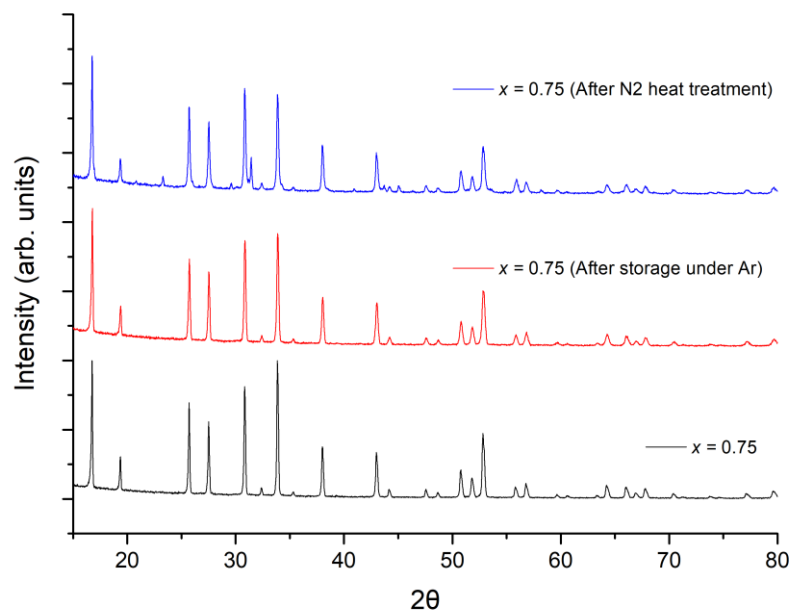

Figure S1a. XRD patterns for  $Li_{5.75}La_3Nb_{1.25}Pr_{0.75}O_{12}$  freshly synthesised, after storage in a Ar glove box for 1 week and after the high temperature  $N_2$  treatment, the latter of which shows phase degradation.

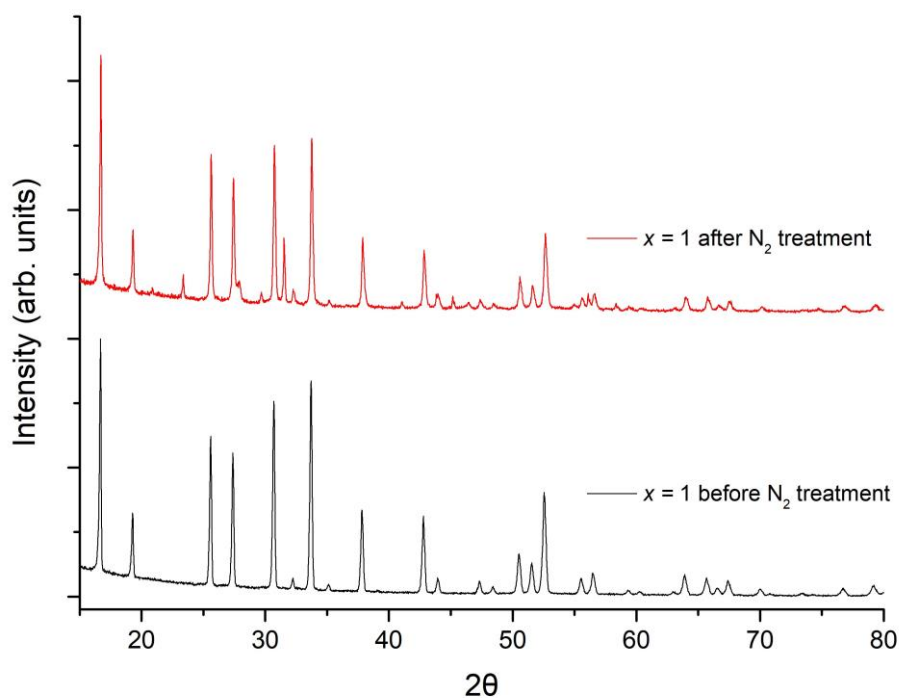

Figure S1b. XRD patterns for  $Li_6La_3Nb_1Pr_1O_{12}$  freshly synthesised and after the high temperature  $N_2$  treatment, the latter of which shows more severe phase degradation than  $x = 0.75$

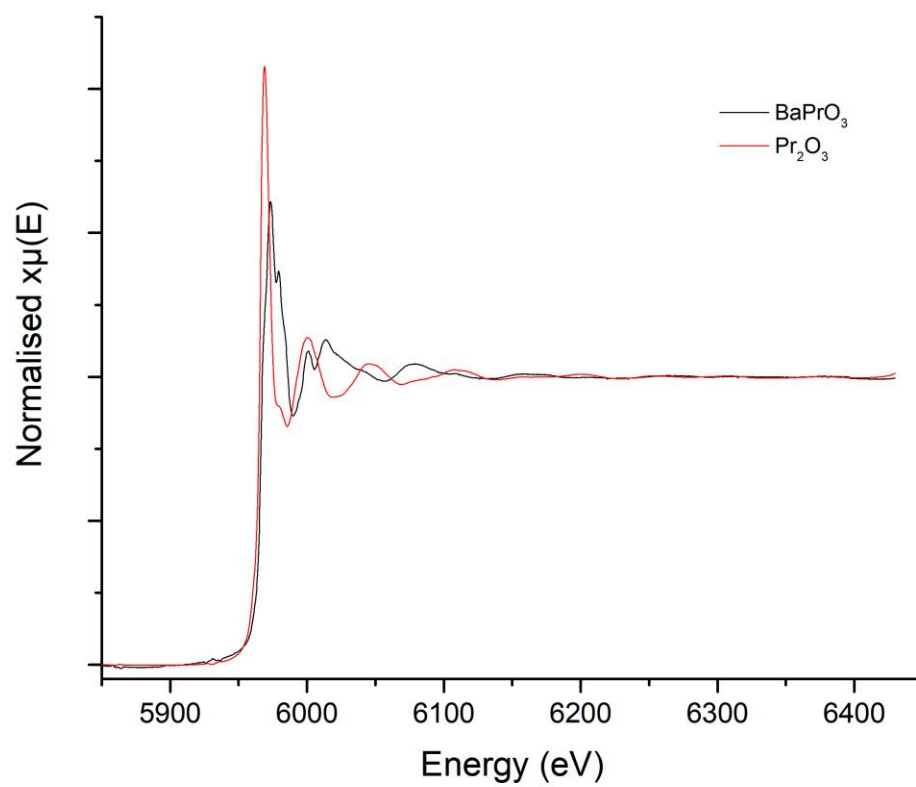

Figure S2. XANES spectra of reference samples  $\text{Pr}_2\text{O}_3$  and  $\text{BaPrO}_3$  overlaid.

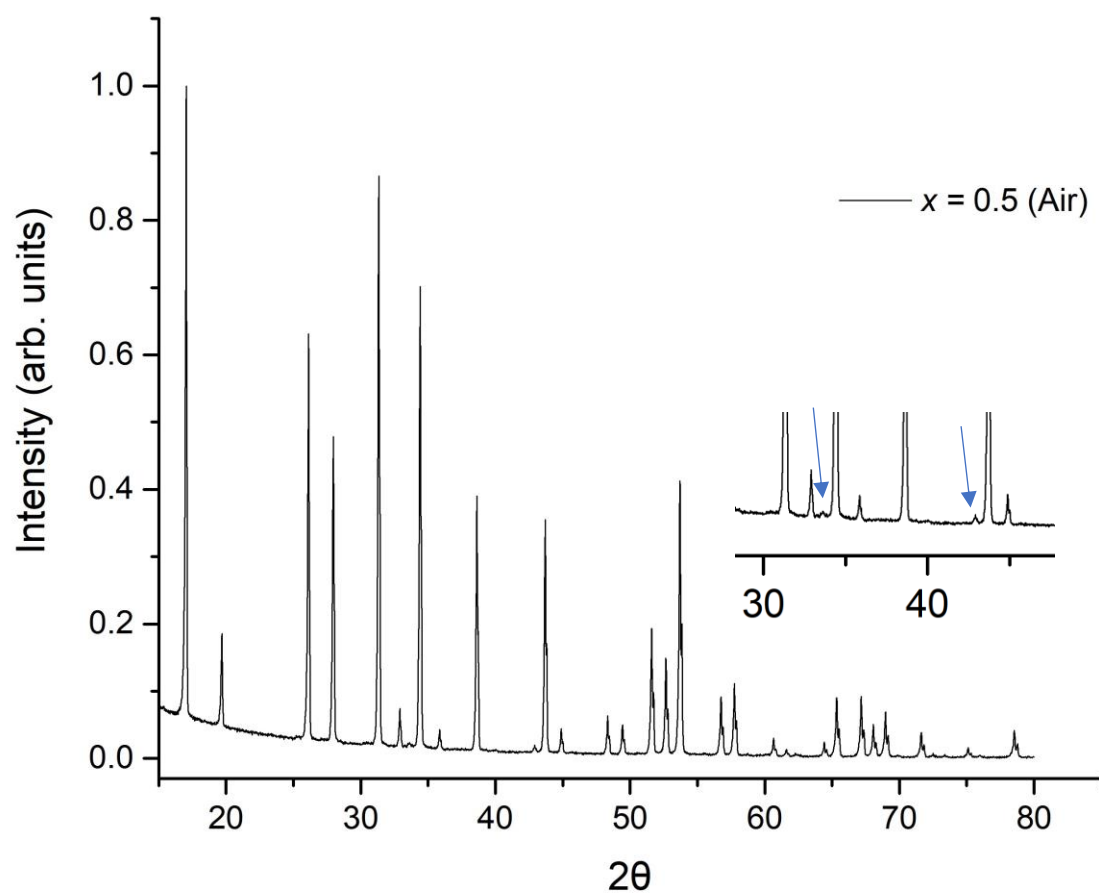

Figure S3. Example XRD of La site doping ( $x = 0.5$  synthesised in air) showing small  $\text{Li}_3\text{NbO}_4$  impurity, marked additionally with arrows in the magnified inlay. This impurity was noted for all air-based synthesis and in some  $\text{H}_2$  synthesised phases.

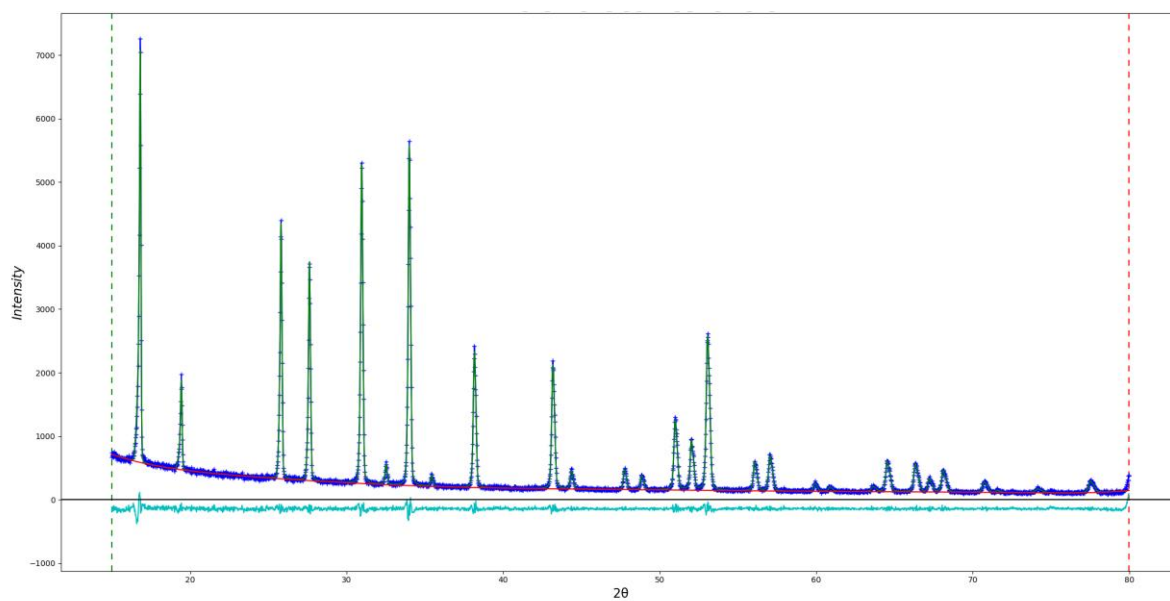

Figure S4. Example Rietveld refinement of Pr LLNO garnet materials. The above example is of  $\text{Li}_{5.5}\text{La}_3\text{Nb}_{1.5}\text{Pr}_{0.5}\text{O}_{12}$

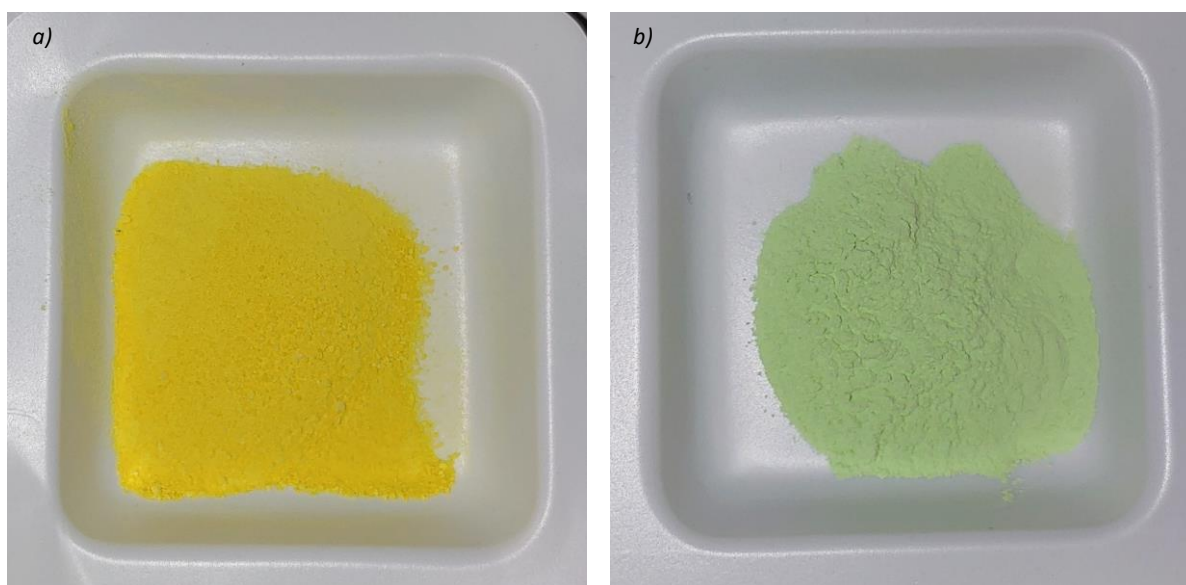

Figure S5. Powder colours of lithium garnet phases where a) is  $\text{Li}_{5.25}\text{La}_3\text{Nb}_{1.75}\text{Pr}_{0.25}\text{O}_{12}$  and b) is  $\text{Li}_5\text{Pr}_{2.5}\text{La}_{2.5}\text{Nb}_2\text{O}_{12}$  synthesised under 5% $\text{H}_2$
